1 **Conserved Structural Motifs in the Hammerhead Ribozyme of a Chloroplast**  
2 **Viroid Mimic tRNA Anticodon Structure to Hijack tRNA Ligase for Viroid**  
3 **Circularization**

4  
5 **Beltrán Ortolá and José-Antonio Daròs**

6  
7 Instituto de Biología Molecular y Celular de Plantas (Consejo Superior de Investigaciones  
8 Científicas-Universitat Politècnica de València), Valencia, Spain

9  
10 Address correspondence to José-Antonio Daròs, [jadaros@ibmcp.upv.es](mailto:jadaros@ibmcp.upv.es)

11  
12 ORCID

13 B. Ortolá, <https://orcid.org/0000-0002-3144-1015>

14 J.A. Daròs, <https://orcid.org/0000-0002-6535-2889>

15  
16  
17 **ABSTRACT.** Viroids belonging to the family *Avsunviroidae* contain hammerhead ribozymes  
18 that process to unit length the oligomeric RNAs of both polarities generated during the rolling-  
19 circle replication that occurs in chloroplasts of host plants. Linear products, with 5'-hydroxyl  
20 and 2',3'-phosphodiester termini, are then recognized and circularized by the host chloroplastic  
21 isoform of the tRNA ligase. Here we analyze the circularization process of eggplant latent  
22 viroid (ELVd), an asymptomatic viroid that infects eggplants (*Solanum melongena* L.), using  
23 an *Escherichia coli* co-expression system in which longer-than-unit linear ELVd (+) precursors  
24 are expressed along with the eggplant chloroplastic tRNA ligase. The RNA precursor contains  
25 two copies of the hammerhead ribozyme and yields the appropriate termini for the tRNA ligase-  
26 mediated ligation in bacteria. We have determined that the ligation efficiency is highly  
27 dependent on the presence of ribozyme sequences in the ligatable termini, since the  
28 circularization of a series of viroid variants in which the ligation position was rearranged  
29 increased substantially in the presence of these sequences. Further *in silico* analysis showed  
30 sequence and structure similarity between the hammerhead ribozyme catalytic pocket and the  
31 anticodon loop of tRNAs, both of which harbor a characteristic U-turn of the phosphodiester  
32 backbone. Directed mutagenesis in the ribozyme domain supports the role of this U-turn loop  
33 in the ligation process. We propose that, in addition to its self-cleavage function, the viroid

34 ribozymes have evolved to mimic the structure of the tRNA anticodon loop to recruit host tRNA  
35 ligase for the circularization of the monomeric linear replication intermediates.

36

37 **IMPORTANCE.** Viroids are a very particular class of infectious agents because they only  
38 consist of a small RNA that, to our current knowledge, does not encode for proteins.  
39 Consequently, viroids parasite host factors and structures to mediate all processes in the  
40 infectious cycle. How these small infectious RNAs are able to hijack host resources is currently  
41 a mystery. In this work, we shed some light on the functionality of hammerhead ribozymes  
42 during replication of viroids that belong to the family *Avsunviroidae*, which replicate in the  
43 chloroplasts. Our findings suggest that, in addition to mediate self-cleavage of replication  
44 intermediates, hammerhead ribozymes also recruit tRNA ligase for monomer circularization,  
45 likely mimicking a common host tRNA structural motif.

46

47 **KEYWORDS:** *Avsunviroidae*, RNA processing, RNA circularization, hammerhead ribozyme,  
48 tRNA ligase, tRNA, anticodon loop, eggplant latent viroid

49

50 Viroids, consisting of small, circular, single-stranded, non-coding RNA molecules ranging  
51 from 246 to 434 nucleotides (nt), are the smallest known infectious agents (Adkar-  
52 Purushothama and Perreault, 2020; Matsushita et al., 2018; Navarro et al., 2021; Wang, 2021).  
53 Viroids rely on their structural RNA elements to hijack the appropriate cellular machinery to  
54 successfully infect certain higher plants, where they complete their replicative cycles. Using  
55 mechanisms that are not yet fully understood, they are able to move between cellular  
56 compartments and through plasmodesmata and phloem to establish systemic infections,  
57 escaping the host defensive response and occasionally causing economically important  
58 diseases.

59 Since most, if not all, processes in viroid's replication cycle are based on interactions  
60 between viroid RNA structures and host elements, the presence or absence of certain conserved  
61 structural domains and motifs correlates with important physiological differences among the  
62 different species; these differences have been used in taxonomy (Di Serio et al., 2014). The  
63 most common and first-described viroids have a functional central conserved region (CCR) in  
64 their molecules and are grouped together within the family *Pospiviroidae*. These viroids  
65 replicate through the asymmetric variant of a rolling circle mechanism (Branch et al., 1988;  
66 Branch and Robertson, 1984). They are imported into the nucleus (Diener, 1971; Spiesmacher  
67 et al., 1983), where they are transcribed by the host DNA-dependent RNA polymerase II to

68 produce lineal concatemers of complementary polarity (Mühlbach and Sängler, 1979). In  
69 viroids, + polarity is arbitrarily attributed to the most abundant circular RNA. Viroid  
70 concatemers of - polarity enter directly into a second round of transcription to form a  
71 complementary concatemer with + polarity. Host factors, such as a particular splicing form of  
72 transcription factor IIIA (TFIIIA-7ZF) and ribosomal protein L5, acting as a splicing regulator,  
73 are also involved in the replication process (Jiang et al., 2018). Finally, CCR elements are  
74 recognized and processed by a host RNase III and DNA ligase 1 to produce the viroid  
75 monomeric circular progeny (Gas et al., 2008, 2007; M. Á. Nohales et al., 2012).

76 Only a few viroids comprise the family *Avsunviroidae* (Di Serio et al., 2018; Flores et  
77 al., 2000). They lack a CCR but do contain functional hammerhead ribozymes in the strands of  
78 both polarities. The members of this family replicate through the symmetric variant of the  
79 rolling-circle mechanism (Branch and Robertson, 1984; Daròs et al., 1994), after they are  
80 imported into the chloroplast (Bonfiglioli et al., 1994), although they may still have a nuclear  
81 phase (Gómez and Pallás, 2012). In this family, the viroid molecules with + polarity serve as  
82 templates in a rolling-circle transcription to produce lineal concatemers with - polarity via a  
83 chloroplastic nuclear-encoded polymerase (Navarro et al., 2000). The action of the  
84 hammerhead ribozymes present in these concatemers produces monomeric intermediates with  
85 5'-hydroxyl and 2',3'-cyclic phosphodiester termini (Daròs and Flores, 2002). These termini  
86 are involved in the formation of an intramolecular 5',3'-phosphodiester linkage to generate  
87 circular molecules with - polarity that serve as templates in a second rolling-circle transcription,  
88 symmetric to the first, that produces concatemers with + polarity, which also self-cleave  
89 through hammerhead ribozymes and then circularize to generate the circular progeny with +  
90 polarity.

91 Initially, ribozymes themselves were believed to circularize viroids; however, given the  
92 low efficiency of the backwards reaction and the formation of 2'-5' linkages, the participation  
93 of a chloroplastic enzyme was suggested (Martínez et al., 2009). However, for several years,  
94 the presence in chloroplasts of enzymes with such properties was unknown. The demonstration  
95 of enzyme intervention in the circularization process within the family *Avsunviroidae* came  
96 from studies with the eggplant latent viroid (ELVd), an asymptomatic infectious agent of  
97 eggplants (*Solanum melongena* L.) that is the only species of the genus *Elaviroid* (Daròs, 2016;  
98 Fadda et al., 2003). If ELVd is expressed as a dimeric transcript in chloroplasts of the unicellular  
99 green alga *Chlamydomonas reinhardtii* (phylum Chlorophyta), it is processed into monomers  
100 and recognized by an enzyme that efficiently circularize the viroid (Martínez et al., 2009;  
101 Molina-Serrano et al., 2007). Moreover, with the unexpected discovery that tRNA splicing

102 machinery is targeted to multiple cellular compartments in plants, including chloroplasts  
103 (Englert et al., 2007), the chloroplastic isoform of the eggplant tRNA ligase was identified as  
104 the host enzyme involved in the circularization of ELVd (and probably of all viroids in the  
105 family *Avsunviroidae*) (M.-A. Nohales et al., 2012). Furthermore, these studies highlighted the  
106 important role that a quasi-double-stranded structure present in the central part of the ELVd  
107 molecule plays in the ligation process (Martínez et al., 2009), along with other domains that are  
108 dispensable for ligation (Daròs et al., 2018). Because this central region results from the  
109 hybridization of the ribozyme domains of both polarities, it has been proposed that ribozyme  
110 sequences and/or structures play critical roles in the ligation of the monomeric linear replication  
111 intermediates, in addition to self-cleavage (Cordero et al., 2018). Experimental support to this  
112 hypothesis was accomplished by taking advantage of an *Escherichia coli* experimental system  
113 that allows for the accumulation of circular ELVd molecules in the bacteria after the co-  
114 expression of ELVd longer-than-unit transcripts and the chloroplastic isoform of the eggplant  
115 tRNA ligase (Cordero et al., 2018; Daròs et al., 2018). In this experimental system, the viroid  
116 expression cassette contains two copies of the hammerhead ribozyme cDNA surrounding the  
117 rest of the viroid sequence, allowing it to mimic natural viroid processing, as it generates a  
118 longer-than-unit viroid transcript in which the activity of the flanking ribozymes produces the  
119 appropriate termini for circularization by the co-expressed eggplant tRNA ligase.

120         Here, we use this *E. coli* co-expression system to gain insight into the ELVd sequence  
121 and structure requirements for recruiting the eggplant chloroplastic tRNA ligase to accomplish  
122 viroid circularization. By producing in *E. coli* a series of ELVd monomeric linear intermediates  
123 –with the ligatable 5'-hydroxyl and 2',3'-cyclic phosphodiester termini opened at different  
124 positions in the molecule– we found that the efficiency of eggplant tRNA ligase-mediated  
125 ligation correlates with the presence of ribozyme sequences at the ligation site. In addition, our  
126 analysis of the hammerhead ribozyme domain reveals similarity between the motif that houses  
127 some of the conserved catalytic sequences and the seven nucleotides of the tRNA anticodon  
128 loop, including a uridine sharp turn that is functionally relevant in both domains. Our analysis  
129 supports that efficient ligation depends on the presence of these conserved sequences in the  
130 motif. Here, we propose a model in which viroid hammerhead ribozymes have evolutionarily  
131 acquired the double function of self-cleavage and of recruiting the host tRNA ligase by  
132 mimicking the host tRNA ligation site.

133

## 134 **RESULTS**

135           **Circularization of ELVd rearranged forms by the eggplant tRNA ligase.** To better  
136 understand the requirements for ELVd circularization by the chloroplastic isoform of eggplant  
137 tRNA ligase, we co-expressed this enzyme in *E. coli* along with different forms of the viroid  
138 monomeric linear replication intermediate opened at different positions in the RNA molecule.  
139 The opening sites are depicted in [Fig. 1A](#) based on an ELVd secondary structure previously  
140 determined experimentally (López-Carrasco et al., 2016). All ELVd forms contained the 5'-  
141 hydroxyl and 2',3'-cyclic phosphodiester termini that are required for circularization by the  
142 tRNA ligase, as they resulted from processing of longer-than-unit precursors by flanking  
143 engineered ribozymes ([Fig. 1B](#) and [Supplementary Dataset 1](#)). We analyzed six monomeric  
144 linear ELVd forms whose circularization by eggplant tRNA ligase had previously been studied  
145 *in vitro* (M.-A. Nohales et al., 2012). Their opening sites were distributed throughout the entire  
146 viroid molecule within regions with different secondary structures and with different terminal  
147 nucleotides ([Fig. 1A](#)). To avoid internal self-cleavage of these monomeric linear ELVd forms  
148 by their endogenous hammerhead ribozyme, the strictly conserved CUGA box was mutated to  
149 UUGG in all of them ([Fig. 1B](#) and [Supplementary Dataset 1](#)).

150           For each ELVd form, three independent co-transformed *E. coli* clones were grown in  
151 liquid cultures, and total RNA was extracted after 24 h. Viroid monomeric circular and linear  
152 molecules were separated using two-dimensional (2D) polyacrylamide gel electrophoresis  
153 (PAGE) and quantified via northern blot hybridization with a complementary <sup>32</sup>P-labelled RNA  
154 probe ([Supplementary Figure S1](#)). The circularization rate (monomeric circular forms divided  
155 by total monomeric forms [linear plus circular]) was calculated from hybridization signals. The  
156 results show that circularization was substantially reduced in all rearranged ELVd forms ([Fig.](#)  
157 [1C](#), gray bars), as compared to wild-type ELVd opened at the genuine position (A333-G1).  
158 Most rearranged forms circularized at a rate of approximately 15% or less with respect to the  
159 wild type ([Fig. 1C](#)); the exception was Variant 3 (U176-C177), which was opened at the upper  
160 strand of the central quasi-double-stranded structure ([Fig. 1A](#)), which circularized about 78%  
161 of the wild type ([Fig. 1C](#)). The strong reduction in circularization of most reorganized variants  
162 precludes the possibility that only the terminal 5'-hydroxyl and 2',3'-cyclic phosphodiester  
163 groups are required for efficient tRNA ligase-mediated ligation of linear ELVd. Interestingly,  
164 the only form that was substantially circularized (Variant 3) is opened at the center of the ELVd  
165 molecule, relatively close to the genuine circularization site. This opening site maps in a domain  
166 that corresponds to the hammerhead ribozyme of complementary (-) polarity, opposite to that  
167 of the + strand in the viroid secondary structure ([Fig. 1A](#)). Overall, these results suggest that

168 the sequences or structures of the hammerhead ribozyme in the vicinity of the ligation site may  
169 favor the recognition of linear ELVd intermediates by the eggplant tRNA ligase.

170 **Effect of the hammerhead ribozyme on tRNA ligase-mediated ELVd**  
171 **circularization.** To test this hypothesis, we analyzed whether the presence of sequences  
172 corresponding to the ELVd (+) hammerhead ribozyme at both termini of the different  
173 rearranged monomeric linear viroid forms affects circularization by the tRNA ligase. To this  
174 end, we built a new set of plasmids to express in *E. coli* the same ELVd rearranged forms, but  
175 now flanked on both sides by the whole domain of the viroid ribozyme with + polarity (Fig. 1B  
176 and [Supplementary Dataset 1](#)). Notably, although this approach returns the native sequence to  
177 the ligation sites, it also results in the insertion of 53 nt (the full ribozyme domain) in different  
178 positions within the viroid molecule. Again, we grew liquid cultures from three independent *E.*  
179 *coli* clones co-transformed to co-express the eggplant tRNA ligase and the different ELVd  
180 forms; viroid RNA was analyzed at 24 h. Remarkably, the ratio of circularization increased  
181 significantly in all rearranged viroid forms when flanked by the hammerhead ribozyme  
182 sequences (Fig. 1C, blue bars). Interestingly, the ratio of circularization of Variant 4 (U245-  
183 U246) was now close to that of the wild type, which was even surpassed in the case of Variant  
184 3 (U176-C177) (Fig. 1C, compare blue bars with that corresponding to wild-type). We also  
185 analyzed the effect of deleting the hammerhead ribozyme in the wild-type monomeric linear  
186 intermediate ([Supplementary Dataset 1](#)). Circularization was drastically reduced to  
187 approximately 28% when replacing flanking native hammerhead ribozymes from the wild-type  
188 viroid by engineered ribozymes (Fig. 1D).

189 To further analyze the effect of hammerhead ribozyme on tRNA ligase-mediated  
190 circularization of ELVd, we focused on Variant 2 (A103-A104), which initially displayed a  
191 moderately low rate of ligation (~6%) that increased to roughly 35% when the viroid ribozyme  
192 halves were added to the terminal ends (Fig. 1C). Based on the version of Variant 2 flanked at  
193 both sides by the viroid ribozymes, we built a new set of plasmids to express monomeric linear  
194 forms (2A to D) in *E. coli*. In these forms, the added ribozymes were extended by 20 nt at the  
195 3' end (2A), the 5' end (2B), or both ends (2C); alternatively, the sequence complementary to  
196 the viroid ribozyme with - polarity was inserted between positions U72 and U73 (2D) to mimic  
197 the secondary structure of wild-type ELVd (Fig. 2A and [Supplementary Dataset 1](#)). Expression  
198 of these viroid forms in *E. coli* along the eggplant tRNA ligase generated increased rates of  
199 ligation compared to Variant 2, in which strict viroid ribozyme was added (Fig. 2B). The 20-nt  
200 3' extension of the ribozyme brought circularization rates close to those of wild-type ELVd,  
201 while the 20-nt 5' extension increased the circularization rate from 35% to approximately 61%.

202 Both extensions together displayed an additive effect, with a rate of ligation that surpassed that  
203 of the wild type. Finally, the insertion of the - ribozyme domain in the opposite strand increased  
204 the rate to approximately 80% (Fig. 2B). Together, these results indicate that the re-creation of  
205 the genuine ligation site in the ELVd molecule dramatically improves tRNA ligase-mediated  
206 ligation.

207 **Effect of mutating the viroid hammerhead ribozyme on tRNA ligase-mediated**  
208 **ELVd circularization.** Because circularization of ELVd forms increases when ligation sites  
209 reside in (or are in the vicinity of) the sequences that conform the hammerhead ribozyme, we  
210 hypothesized that, in addition to self-cleavage, the sequences in this domain may also be  
211 involved in recognition by the eggplant tRNA ligase, perhaps by mimicking *bonafide* tRNA  
212 ligase substrates, such as the tRNA halves. To further investigate this hypothesis, we used the  
213 JAR3D program (Zirbel et al., 2015), which scores RNA hairpin and internal loop sequences  
214 against motif groups from the RNA three-dimensional motif atlas (Petrov et al., 2013), to search  
215 for conserved geometries (other than that of the hammerhead fold) in the sequences of the  
216 ribozyme domains of both polarities in the five currently known members of the family  
217 *Avsunviroidae* (Di Serio et al., 2018). Interestingly, all ribozyme sequences that were analyzed  
218 showed significant matches with the tRNA fold. In its most common configuration, the  
219 anticodon hairpin is composed by a 7-nt loop closing a 5-nt stem. The first two nucleotides of  
220 the loop are highly conserved as YU (being the CU pair more common than UU). The pre-  
221 tRNA intron is spliced-out from nucleotides R and N after the variable anticodon triplet (being  
222 A more common than G in the first case, and a preponderance of A in the second) (Fig. 3A,  
223 left). The uridine of the conserved sequence YU induces a characteristic U-turn—a rigid sharp  
224 turn of the polynucleotide backbone between the U and the first nucleotide of the anticodon—  
225 that is necessary to present the anticodon trinucleotide (Robertus et al., 1974). These overall  
226 characteristics seem to be conserved in the U-turn loop of the viroid hammerhead ribozymes,  
227 located between helices I and II (Fig. 3A, right). This U-turn loop contains the conserved  
228 catalytic sequence CUGAYGA (Doudna and Cech, 1995; Pley et al., 1994). This sharp turn in  
229 the ribozyme phosphate backbone seems to allow the correct positioning of the three helices,  
230 accommodating the core nucleotides in the appropriate places for the self-cleavage reaction.  
231 We reasoned that this turn must have an important role generating the structure that is  
232 recognized by tRNA ligase.

233 In light of this rationale, we designed a set of mutations aimed at testing the mimicry  
234 hypothesis, focusing on modifying the set of nucleotides within this U-turn loop that can be  
235 relevant in the sharp turn and maintenance of the structure, while being close enough to interact

236 with the cleaved nucleotides. We tried to avoid substantial modifications in the overall  
237 secondary structure that the ribozyme acquires during the ligation process. We made these  
238 modifications on Variant 4, flanked by two ELVd ribozyme copies. This form is circularized at  
239 high levels (Fig. 1C), which makes it possible to analyze the role of the ribozyme without the  
240 additive effect of the presence of the domain of the ribozyme of complementary polarity at the  
241 natural ligation site. Since modifications in the ribozyme domain have detrimental effects on  
242 the correct processing of the precursor RNA, we employed the engineered ribozymes strategy  
243 to generate the ligatable termini (Supplementary Dataset S1). We first modified the conserved  
244 nucleotides C19-U20 to GA via site-directed mutagenesis (Fig. 3A, right, Variant 4A). These  
245 two positions in the hammerhead ribozyme sequence are analogous to the dinucleotide that  
246 contains the U-turn and precedes the anticodon in the tRNA. We also modified the conserved  
247 nucleotides G21-A22, together with the non-conserved U23, to AAC (Fig. 3A, right, Variant  
248 4B); these three nucleotides are the equivalent of the anticodon triplet. The longer-than-unit  
249 ELVd precursors containing these mutations were co-expressed in *E. coli* with the eggplant  
250 tRNA ligase; total RNA was separated using 2D-PAGE and analyzed by northern blot  
251 hybridization. Interestingly, a drastic reduction in circularization was induced by modifying  
252 both sets of nucleotides; the circularization rates fell to approximately 8% and 11% compared  
253 to the wild type when the conserved CU or the three GAU nucleotides were modified,  
254 respectively (Fig. 3B). Additionally, we tested the functionality of the U-turn in the enzymatic  
255 ligation of terminal nucleotides that are located far from it by shifting the ligation point away  
256 but keeping it in the ribozyme sequence. The two new opening sites were located within the  
257 terminal loops of helices I and II (between positions U9-G10 and A32-A33, respectively) (Fig.  
258 3A, right, Variants 4C and 4D). Northern blot analysis of the total RNA from recombinant  
259 bacteria separated by 2D-PAGE showed a reduction to approximately 4 and 24% in the  
260 circularization when the ligation site is located in the helix I and II, respectively (Fig. 3B).  
261 Altogether, these results support a role for the ribozyme U-turn loop and, more specifically, for  
262 some of its conserved residues, not only in ribozyme self-cleavage but also in the circularization  
263 process. Considering that these nucleotides are conserved when compared to those present in  
264 the tRNA anticodon loop and appear to acquire the same general structure, we posit that a  
265 structural mimicry of tRNA is probably occurring to recruit the host tRNA ligase that joins  
266 terminal residues located in the vicinity of the internal loop.

267

268 **DISCUSSION**



269 In viroid RNA molecules, all of the sequences and structures that are essential to  
270 completing replicative cycles are densely packed into small genomes. Due to this tight packing,  
271 some motifs likely perform multiple functions and participate in several processes of infection;  
272 they are probably recognized by various cellular structures or proteins in the host plant. An  
273 example of this functional multiplicity is the loop E motif, which is present in the CCR of the  
274 potato spindle tuber viroid. In addition to its canonical role in viroid processing and ligation  
275 (Diener, 1986; Gas et al., 2007), loop E has also been associated with the regulation of transcript  
276 levels for both, modulate the dynamics of infection (Adkar-Purushothama and Perreault, 2020)  
277 and host adaptation (Qi and Ding, 2002; Wassenegger et al., 1996), and with symptom induction  
278 (Qi and Ding, 2003). Either loop E submotifs or various transient secondary structures must be  
279 responsible for interaction with different host factors (Qi and Ding, 2003). Similarly, in the case  
280 of ELVd, while hammerhead ribozymes are involved in the processing of viroid oligomeric  
281 transcripts to produce monomeric units, previous research suggests that they may also be  
282 involved in the circularization process by adopting a hypothetical transitory structure that favors  
283 ligation (Cordero et al., 2018).

284 To better understand the role of hammerhead ribozyme in tRNA ligase-mediated ELVd  
285 circularization, we used an *E. coli*-based experimental system to analyze the ligation of  
286 reorganized ELVd monomers with ligatable 5'-hydroxyl and 2',3'-cyclic phosphodiester  
287 terminal groups. Most reorganized forms circularized at substantially lower rates than the  
288 genuine linear intermediate (Fig. 1). This result is in agreement with a previous *in vitro* analysis  
289 of these same mutants (M.-A. Nohales et al., 2012). Next, we assessed the effect of inserting  
290 the ribozyme halves in the different opening sites. The eggplant tRNA ligase-mediated  
291 circularization rate significantly increased in all forms when the opening site included the ELVd  
292 ribozyme halves (Fig. 1). These results constitute strong evidence for the role of the ribozyme  
293 sequences in ELVd ligation.

294 Next, taking Variant 2 with flanking ELVd hammerhead ribozymes as a case study, we  
295 analyzed whether bordering sequences next to the ribozyme domain further favor  
296 circularization. Variant 2 shares some properties with the wild-type linear replication  
297 intermediate; the opening site is also found next to a loop in the middle of a quasi-double-  
298 stranded structure (Fig. 2A). However, Variant 2 is poorly circularized in the absence of  
299 terminal ELVd ribozyme sequences (Fig. 1C). The results again showed improved ligation in  
300 all cases, including when sequences corresponding to the domain of the - polarity hammerhead  
301 ribozyme were added to mimic the situation in the wild-type linear intermediate (Fig. 2). The  
302 location of the ligation site in a central position of the viroid molecule in a quasi-rod-like

303 structure (which results from the hybridization of both hammerhead domains) is a common  
304 feature in the family *Avsunviroidae* (Giguère et al., 2014). Both strands may exist in a steady  
305 state between the compact rod shape and alternative foldings that permit access to the tRNA  
306 ligase, possibly facilitated by the sequences surrounding the ribozyme.

307 After experimental confirmation that the terminal sequences and the domain of the  
308 hammerhead ribozyme with - polarity are important for efficient ligation, we searched for an  
309 alternative folding that may explain these results using the JAR3D program. Interestingly,  
310 homology-based modelling revealed that the internal U-turn loop C19-A25 of the hammerhead  
311 ribozyme can fold in a similar fashion to the conserved anticodon loop of tRNAs (Fig. 3A).  
312 Mutational analysis of the ELVd flanking ribozymes in Variant 4 supports the importance of  
313 these conserved sequences. On one hand, two modifications in the ribozyme's highly conserved  
314 CUGA and GA motifs (along with the non-conserved U residue), drastically reduced  
315 circularization to similar amounts in both cases (Fig. 3B). Since this reduction occurs without  
316 noticeable variation in the accumulation of linear intermediates with respect to the same  
317 variants without mutations in the ribozyme, these results suggest that some of the conserved  
318 sequences of the ribozyme catalytic core also play a role in circularization. The decrease in  
319 circularization when modifying the equivalent of the anticodon triplet is remarkable, since  
320 greater flexibility could be expected given that these nucleotides are variable in the canonical  
321 substrates (the tRNAs) of the enzyme. Whether hammerhead ribozymes have adapted to  
322 efficiently mimic a particular codon or whether these modified nucleotides are also essential  
323 for maintaining the structure recognized by the ligase remains unsolved. On the other hand,  
324 maintaining this conserved sequence but moving the ligation site away from it dramatically  
325 reduced circularization (Fig. 3B). Based on the predicted secondary structure of the ribozyme  
326 (Fig. 3A, right), the *bonafide* ligation site is located in the vicinity of the U-turn loop that shares  
327 structural homology with the anticodon loop, while the new opening sites (located in both  
328 helices I and II loops) are far apart from this loop. Since the circularization efficiencies between  
329 the two mutants were different, we can infer that the ability of the phosphate backbone to  
330 restructure and reposition both terminal nucleotides very close to the U-turn loop with greater  
331 or lesser ease (helix I and II, respectively), affects the catalytic capacity of the enzyme.  
332 Therefore, the proximity of the terminal residues to the loop seems to be an important factor in  
333 the ligation process.

334 tRNA primary transcripts (pre-tRNAs) are extensively modified after transcription. One  
335 of these modifications is performed by tRNA splicing endonuclease, which is responsible for  
336 releasing a short intron that, in eukaryotes, usually resides in the anticodon loop between

337 nucleotides 37 and 38; it generates two tRNA halves containing 2',3'-cyclic phosphate and 5'-  
338 hydroxyl ends (Yoshihisa, 2014). In plants, both halves are healed and sealed by the multiple  
339 activities of the tRNA ligase (Englert and Beier, 2005). Although splicing of tRNAs, either  
340 cytoplasmic or organellar, occurs primarily in the cytoplasm, tRNA ligase reportedly also  
341 targets other organelles, such as chloroplasts (Englert et al., 2007). This enzyme has been  
342 reported to be involved in the repair mechanism for damaged tRNAs, in the circularization of  
343 viroids of the family *Avsunviroidae*, and in other non-conventional RNA splicing functions  
344 (Englert et al., 2007; Nagashima et al., 2016; M.-A. Nohales et al., 2012). For example, the  
345 *Arabidopsis thaliana* tRNA ligase is involved in initiating zygote division, which may be  
346 mediated not only by pre-tRNA processing but also by some unconventional splicing reactions  
347 (Yang et al., 2017). This same enzyme has been associated with the stress response to unfolded  
348 proteins (Mori et al., 2010; Nagashima et al., 2016; Peschek et al., 2015), as it mediates in the  
349 splicing of an mRNA encoding a stress-specific transcription factor. Some researchers have  
350 speculated that tRNA ligase can recognize certain RNA structures conserved between species  
351 (Mori et al., 2010). In addition, thermal denaturation abolishes ligation, although it remains  
352 unknown whether this is caused by moving the ligatable termini away or by interrupting  
353 secondary structures that the enzyme could recognize (Peschek et al., 2015). Finally, this  
354 enzyme is presumed to remain bound to the spliced RNA –as occurs with the exon junction  
355 complex– and to interact with the translation machinery (Mori et al., 2010). A similar  
356 ribonucleoprotein complex has also been proposed between tRNA ligase and the viroid when  
357 co-expressed in *E. coli* (Daròs et al., 2018).

358         Although it is not known exactly how recognition between the tRNA ligase and the  
359 tRNA halves occurs, our work may shed light on both the pre-tRNA processing and the viroid  
360 circularization. Several enzymes are known to include domains that interact with specific  
361 anticodon loops; these include aminoacyl-tRNA synthases (Rubio Gomez and Ibba, 2020).  
362 However, in the case of tRNA ligase, a single enzyme must recognize tRNAs with different  
363 anticodons. Therefore, it is expected that this interaction would not be highly restrictive to  
364 particular sequences, instead relying on recognizing a common feature, such as that one that  
365 apparently can generate the U-turn. This recognition flexibility would have been exploited by  
366 non-canonical RNA substrates such as viroids. Similar mimicry relationships may also be used  
367 by other RNAs ligated by tRNA ligase; therefore, structural characteristics similar to those  
368 described here can be expected in other cellular RNAs.

369         Viroids adapted to replicating autonomously with minimum sequences, and ribozymes  
370 have the capacity to catalyze the backwards self-ligation reaction, possibly via conformational

371 changes (Canny et al., 2007; Nelson et al., 2005). Therefore, it is a paradox that viroid self-  
372 ligation capacity remains very inefficient and the circularization is mediated by a host  
373 enzymatic activity (Martínez et al., 2009; M.-A. Nohales et al., 2012). Possibly, as viroids  
374 became obligate and exclusive parasites of plants, viroid hammerhead ribozymes lost their  
375 ability to acquire the adequate conformation for efficient self-ligation, adapting to host ligases  
376 by remodelling their variable regions while maintaining the residues strictly required for self-  
377 cleavage.

378 In conclusion, we propose here that viroid hammerhead ribozymes have evolved to  
379 mimic the structure of endogenous cellular RNAs that are native substrates for the host tRNA  
380 ligase. These ribozymes probably adopt an alternative transitory folding (mimicking that of the  
381 tRNA anticodon loop), being able to recruit the enzyme while maintaining its self-cleavage  
382 function. In this way, they mediate two steps required in viroid RNA processing: cleavage of  
383 multimeric transcripts and circularization of the resultant monomers. The mechanistic model  
384 that summarizes the results and observations of this work is shown in [Figure 4](#). Although we  
385 have focused on ELVd circularization, what is described here may be a common feature for all  
386 members of the family *Avsunviroidae*, considering that the key elements of ribozyme sequence  
387 and structure are conserved among species.

388

## 389 **MATERIALS AND METHODS**

390 **Construction of plasmids to express ELVd variants in *E. coli*.** Several variants of the  
391 ELVd reference sequence (GenBank accession number NC\_039241.1) were expressed in *E.*  
392 *coli* from plasmid pLELVd-2 (Daròs et al., 2018). In this plasmid, a longer-than-unit ELVd  
393 RNA with + polarity, flanked by two copies of the hammerhead ribozyme (positions C327 to  
394 G46), is expressed under the control of the *E. coli* murein lipoprotein promoter and the 5S rRNA  
395 (*rrnC*) terminator. This plasmid contains a pUC replication origin and a selection marker that  
396 confers ampicillin resistance (Daròs et al., 2018). The mutations in the ELVd sequence  
397 contained in this plasmid were created via standard molecular biology techniques. DNA  
398 amplifications were performed by polymerase chain reaction (PCR) using the Phusion high-  
399 fidelity DNA polymerase (Thermo Scientific). PCR products of the appropriate size were  
400 electrophoretically separated in 1% agarose gels and recovered by elution. When required,  
401 oligonucleotide primers or PCR products were phosphorylated with T4 polynucleotide kinase  
402 (Thermo Scientific). Plasmid assembly was performed by ligation with T4 DNA ligase (Thermo  
403 Scientific) or by the Gibson reaction using the NEBuilder HiFi assembly master mix (New  
404 England Biolabs). *E. coli* DH5 $\alpha$  cells were electroporated with the resulting plasmids; the

405 recombinant clones were selected on plates with lysogeny broth (LB) medium containing  
406 50 µg/ml ampicillin. The plasmids that contained the desired mutations were selected using  
407 antibiotic resistance, electrophoretic analysis, and sequencing (3130xl Genetic Analyzer, Life  
408 Technologies).

409 **Co-expression of the ELVd variants and eggplant tRNA ligase in *E. coli*.** To study  
410 circularization of the different ELVd variants, *E. coli* DH5α cells were co-electroporated with  
411 pLELVd-2 derivatives (see above) and p15LtRnlSm (Daròs et al., 2018), which encodes the  
412 chloroplastic isoform of the eggplant tRNA ligase (GenBank accession no. JX0225157). The  
413 expression of this protein is also under the control of the *E. coli* murein lipoprotein promoter  
414 and the *rrnC* terminator; the plasmid contains a p15A replication origin and a chloramphenicol  
415 selection marker (Daròs et al., 2018). Recombinant colonies were selected for in plates with 50  
416 µg/ml ampicillin and 34 µg/ml chloramphenicol. Isolated colonies were inoculated into 50 ml  
417 tubes with 5 ml of LB medium containing both antibiotics and were grown for 24 h at 37°C  
418 with vigorous shaking (225 revolutions per min).

419 **RNA extraction.** Aliquots (2 ml) of the cultures were taken at the indicated times. Cells  
420 were pelleted by centrifugation at 13,000 rpm for 2 min and resuspended in 50 µl of TE buffer  
421 (10 mM Tris-HCl, pH 8.0, 1 mM EDTA). One volume of a 1:1 (v/v) mixture of phenol  
422 (saturated with water and equilibrated to pH 8.0 with Tris-HCl, pH 8.0) and chloroform was  
423 added; the cells were lysed by vigorous vortexing. After centrifugation at 13,000 rpm for 5 min,  
424 the aqueous phases with the total bacterial RNA were recovered. They were subjected directly  
425 to analysis or were stored at -20°C.

426 **RNA analysis.** Total *E. coli* RNA was separated by 2D-PAGE (Daròs, 2022; Ortolá et  
427 al., 2021). Aliquots (20 µl) of the aqueous phases were mixed with 1 volume of loading buffer  
428 (98% formamide, 10 mM Tris-HCl, pH 8.0, 1 mM EDTA, 0.0025% bromophenol blue, and  
429 0.0025% xylene cyanol); they were incubated for 1.5 min at 95°C and snap-cooled on ice. RNA  
430 was separated under denaturing conditions in 5% polyacrylamide gels (37.5:1 acrylamide:N,N-  
431 methylenebisacrylamide) in TBE buffer (89 mM Tris, 89 mM boric acid, and 2 mM EDTA)  
432 with 8 M urea. The electrophoresis was carried out at 200 V for 2 h; the gels were then stained  
433 with agitation in 200 ml of 1 µg/ml ethidium bromide for 15 min. After washing three times  
434 with water, fluorescence in the gel was recorded under UV light (UVIdoc-HD2/20MX,  
435 UVITEC). The lanes of interest were then cut and placed transversely on top of a series of  
436 denaturing (8 M urea) 5% polyacrylamide gels casted as described above, but in 0.25X TBE  
437 buffer. These electrophoreses were run at 350 V (maximum 25 mA) for 2.5 h, and the gels were  
438 stained and recorded as described above.

439 After 2D-PAGE separation, RNA was electroblotted to positively charged nylon  
440 membranes (Nytran SPC, Whatman) and crosslinked with 1.2 J/cm<sup>2</sup> UV light. Membranes were  
441 then subjected to hybridization overnight at 70°C with hybridization buffer (50% formamide,  
442 0.1% Ficoll, 0.1% polyvinylpyrrolidone, 100 ng/ml salmon sperm DNA, 1% sodium dodecyl  
443 sulfate –SDS–, 0.75 M NaCl, 75 mM sodium citrate, pH 7.0) containing approximately 1  
444 million counts per minute of a <sup>32</sup>P-labeled monomeric ELVd RNA probe with - polarity. The  
445 ELVd probe was obtained via *in vitro* transcription of a linearized plasmid for 1 h at 37°C with  
446 20 U of T3 bacteriophage RNA polymerase (Roche) in 40 mM Tris-HCl, pH 8.0, 6 mM MgCl<sub>2</sub>,  
447 20 mM DTT, 2 mM spermidine, 0.5 mM each of ATP, CTP and GTP, 50 µCi of [ $\alpha$ -<sup>32</sup>P]UTP  
448 (800 Ci/mmol), 20 U RNase inhibitor (RiboLock, Thermo Scientific), and 0.1 U yeast inorganic  
449 pyrophosphatase (Thermo Scientific). After transcription, the linearized plasmid was digested  
450 with 20 U DNase I (Thermo Scientific) for 10 min at 37°C. The radioactive probe was purified  
451 chromatographically with a Sephadex G-50 column (mini Quick Spin DNA Columns, Roche).  
452 After hybridization, the membranes were washed three times for 10 min at room temperature  
453 with 2X SSC (1X SSC is 150 mM NaCl, 15 mM sodium citrate, pH 7.0), 0.1% SDS; they were  
454 washed once for 15 min at 55°C with 0.1X SSC, 0.1% SDS. Hybridization signals were  
455 recorded in an imaging plate (BAS-MP, FujiFilm) and quantified using an image analyzer  
456 (Amersham Typhoon, GE Healthcare).

457 **Computational analysis.** The minimum free energy conformation of the various  
458 monomeric linear ELVd variants was predicted using the CentroidFold algorithm (Sato et al.,  
459 2009). Homology between RNA loops was analyzed using the JAR3D algorithm (Zirbel et al.,  
460 2015).

461

## 462 **ACKNOWLEDGEMENTS**

463 This research was supported by grants BIO2017-91865-EXP and PID2020-114691RB-  
464 I00 from Ministerio de Ciencia e Innovación (Spain) through the Agencia Estatal de  
465 Investigación, co-financed by European Regional Development Fund. B.O. was the recipient  
466 of a pre-doctoral contract (PAID-01-17) from Universitat Politècnica de València.

467 B.O and J.A.D. designed the research. B.O. performed the experiments. B.O and J.A.D  
468 analyzed the results and wrote the article.

469

## 470 **REFERENCES**

471 Adkar-Purushothama, C.R., Perreault, J.P., 2020. Current overview on viroid–host interactions.  
472 Wiley Interdiscip. Rev. RNA. <https://doi.org/10.1002/wrna.1570>

- 473 Bonfiglioli, R.G., McFadden, G.I., Symons, R.H., 1994. In-situ hybridization localizes avocado  
474 sunblotch viroid on chloroplast thylakoid membranes and coconut cadang cadang viroid  
475 in the nucleus. *Plant J.* 6, 99–103.
- 476 Branch, A.D., Benenfeld, B.J., Robertson, H.D., 1988. Evidence for a single rolling circle in  
477 the replication of potato spindle tuber viroid. *Proc. Natl. Acad. Sci. U.S.A.* 85, 9128–9132.
- 478 Branch, A.D., Robertson, H.D., 1984. A replication cycle for viroids and other small infectious  
479 RNAs. *Science* (80-. ). 223, 450–455.
- 480 Canny, M.D., Jucker, F.M., Pardi, A., 2007. Efficient ligation of the *Schistosoma* hammerhead  
481 ribozyme. *Biochemistry* 46, 3826–3834.
- 482 Cordero, T., Ortolá, B., Daròs, J.A., 2018. Mutational analysis of Eggplant Latent Viroid RNA  
483 circularization by the eggplant tRNA ligase in *Escherichia coli*. *Front. Microbiol.* 9, 635.  
484 <https://doi.org/10.3389/fmicb.2018.00635>
- 485 Daròs, J.-A., 2022. Two-Dimensional Polyacrylamide Gel Electrophoresis Analysis of Viroid  
486 RNAs, in: *Methods in Molecular Biology* (Clifton, N.J.). *Methods Mol Biol*, pp. 79–88.  
487 [https://doi.org/10.1007/978-1-0716-1464-8\\_8](https://doi.org/10.1007/978-1-0716-1464-8_8)
- 488 Daròs, J.A., 2016. Eggplant latent viroid: a friendly experimental system in the family  
489 *Avsunviroidae*. *Mol. Plant Pathol.* <https://doi.org/10.1111/mpp.12358>
- 490 Daròs, J.A., Aragonés, V., Cordero, T., 2018. A viroid-derived system to produce large amounts  
491 of recombinant RNA in *Escherichia coli*. *Sci. Rep.* 8, 1904.  
492 <https://doi.org/10.1038/s41598-018-20314-3>
- 493 Daròs, J.A., Flores, R., 2002. A chloroplast protein binds a viroid RNA in vivo and facilitates  
494 its hammerhead-mediated self-cleavage. *EMBO J.* 21, 749–759.  
495 <https://doi.org/10.1093/emboj/21.4.749>
- 496 Daròs, J.A., Marcos, J.F., Hernández, C., Flores, R., 1994. Replication of avocado sunblotch  
497 viroid: Evidence for a symmetric pathway with two rolling circles and hammerhead  
498 ribozyme processing. *Proc. Natl. Acad. Sci. U. S. A.* 91.  
499 <https://doi.org/10.1073/pnas.91.26.12813>
- 500 Di Serio, F., Flores, R., Verhoeven, J.T., Li, S.F., Pallás, V., Randles, J.W., Sano, T., Vidalakis,  
501 G., Owens, R.A., 2014. Current status of viroid taxonomy. *Arch Virol* 159, 3467–3478.  
502 <https://doi.org/10.1007/s00705-014-2200-6>
- 503 Di Serio, F., Li, S.F., Matousek, J., Owens, R.A., Pallás, V., Randles, J.W., Sano, T.,  
504 Verhoeven, J.T.J., Vidalakis, G., Flores, R., Consortium, I.R., 2018. ICTV Virus  
505 Taxonomy Profile: *Avsunviroidae*. *J. Gen. Virol.* 99, 611–612.  
506 <https://doi.org/10.1099/jgv.0.001045>

- 507 Diener, T.O., 1986. Viroid processing: a model involving the central conserved region and  
508 hairpin I. *Proc. Natl. Acad. Sci. U.S.A.* 83, 58–62.
- 509 Diener, T.O., 1971. Potato spindle tuber virus: a plant virus with properties of a free nucleic  
510 acid. III. Subcellular location of PSTV-RNA and the question of whether virions exist in  
511 extracts or in situ. *Virology* 43, 75–89.
- 512 Doudna, J.A., Cech, T.R., 1995. Self-assembly of a Group I intron active site from its  
513 component tertiary structural domains. *RNA* 1, 36–45.
- 514 Englert, M., Beier, H., 2005. Plant tRNA ligases are multifunctional enzymes that have  
515 diverged in sequence and substrate specificity from RNA ligases of other phylogenetic  
516 origins. *Nucleic Acids Res.* 33, 388–399.
- 517 Englert, M., Latz, A., Becker, D., Gimple, O., Beier, H., Akama, K., 2007. Plant pre-tRNA  
518 splicing enzymes are targeted to multiple cellular compartments. *Biochimie* 89, 1351–  
519 1365.
- 520 Fadda, Z., Daròs, J.A., Fagoaga, C., Flores, R., Duran-Vila, N., 2003. Eggplant Latent Viroid,  
521 the Candidate Type Species for a New Genus within the Family Avsunviroidae  
522 (Hammerhead Viroids). *J. Virol.* 77, 6528–6532. [https://doi.org/10.1128/jvi.77.11.6528-](https://doi.org/10.1128/jvi.77.11.6528-6532.2003)  
523 [6532.2003](https://doi.org/10.1128/jvi.77.11.6528-6532.2003)
- 524 Flores, R., Daròs, J.A., Hernández, C., 2000. Avsunviroidae family: Viroids containing  
525 hammerhead ribozymes. *Adv. Virus Res.* [https://doi.org/10.1016/s0065-3527\(00\)55006-4](https://doi.org/10.1016/s0065-3527(00)55006-4)
- 526 Gas, M.-E., Hernández, C., Flores, R., Daròs, J.-A., 2007. Processing of nuclear viroids in vivo:  
527 An interplay between RNA conformations. *PLoS Pathog.* 3.  
528 <https://doi.org/10.1371/journal.ppat.0030182>
- 529 Gas, M.-E., Molina-Serrano, D., Hernández, C., Flores, R., Daròs, J.-A., 2008. Monomeric  
530 linear RNA of Citrus Exocortis Viroid resulting from processing in vivo has 5'-  
531 phosphomonoester and 3'-hydroxyl termini: Implications for the RNase and RNA ligase  
532 involved in replication. *J. Virol.* 82. <https://doi.org/10.1128/JVI.01229-08>
- 533 Giguère, T., Adkar-Purushothama, C.R., Bolduc, F., Perreault, J.P., 2014. Elucidation of the  
534 structures of all members of the Avsunviroidae family. *Mol. Plant Pathol.* 15, 767–779.
- 535 Gómez, G., Pallás, V., 2012. Studies on subcellular compartmentalization of plant pathogenic  
536 noncoding RNAs give new insights into the intracellular RNA-traffic mechanisms. *Plant*  
537 *Physiol.* 159, 558–564. <https://doi.org/10.1104/pp.112.195214>
- 538 Jiang, J., Smith, H.N., Ren, D., Dissanayaka Mudiyansele, S.D., Dawe, A.L., Wang, L.,  
539 Wang, Y., 2018. Potato Spindle Tuber Viroid Modulates Its Replication through a Direct  
540 Interaction with a Splicing Regulator. *J. Virol.* 92. <https://doi.org/10.1128/jvi.01004-18>



- 541 López-Carrasco, A., Gago-Zachert, S., Mileti, G., Minoia, S., Flores, R., Delgado, S., 2016.  
542 The transcription initiation sites of eggplant latent viroid strands map within distinct motifs  
543 in their in vivo RNA conformations. *RNA Biol.* 13, 83–97.  
544 <https://doi.org/10.1080/15476286.2015.1119365>
- 545 Martínez, F., Marqués, J., Salvador, M.L., Darós, J.-A., 2009. Mutational analysis of eggplant  
546 latent viroid RNA processing in *Chlamydomonas reinhardtii* chloroplast. *J. Gen. Virol.*  
547 90. <https://doi.org/10.1099/vir.0.013425-0>
- 548 Matsushita, Y., Yanagisawa, H., Sano, T., 2018. Vertical and horizontal transmission of  
549 pospiviroids. *Viruses.* <https://doi.org/10.3390/v10120706>
- 550 Molina-Serrano, D., Suay, L., Salvador, M.L., Flores, R., Daròs, J.-A., 2007. Processing of  
551 RNAs of the family Avsunviroidae in *Chlamydomonas reinhardtii* chloroplasts. *J. Virol.*  
552 81. <https://doi.org/10.1128/JVI.02556-06>
- 553 Mori, T., Ogasawara, C., Inada, T., Englert, M., Beier, H., Takezawa, M., Endo, T., Yoshihisa,  
554 T., 2010. Dual functions of yeast tRNA ligase in the unfolded protein response:  
555 Unconventional cytoplasmic splicing of HAC1 pre-mRNA is not sufficient to release  
556 translational attenuation. *Mol. Biol. Cell* 21, 3722–3734.  
557 <https://doi.org/10.1091/mbc.E10-08-0693>
- 558 Mühlbach, H.P., Sängler, H.L., 1979. Viroid replication is inhibited by a-amanitin. *Nature* 278,  
559 185–188.
- 560 Nagashima, Y., Iwata, Y., Mishiba, K.I., Koizumi, N., 2016. Arabidopsis tRNA ligase  
561 completes the cytoplasmic splicing of bZIP60 mRNA in the unfolded protein response.  
562 *Biochem. Biophys. Res. Commun.* 470, 941–946.  
563 <https://doi.org/10.1016/j.bbrc.2016.01.145>
- 564 Navarro, B., Flores, R., Di Serio, F., 2021. Advances in Viroid-Host Interactions. *Annu. Rev.*  
565 *Virol.* 8, 305–325. <https://doi.org/10.1146/annurev-virology-091919-092331>
- 566 Navarro, J.A., Vera, A., Flores, R., 2000. A chloroplastic RNA polymerase resistant to  
567 tagetitoxin is involved in replication of avocado sunblotch viroid. *Virology* 268, 218–225.  
568 <https://doi.org/10.1006/viro.1999.0161>
- 569 Nelson, J.A., Shepotinovskaya, I., Uhlenbeck, O.C., 2005. Hammerheads derived from sTRSV  
570 show enhanced cleavage and ligation rate constants. *Biochemistry* 44, 14577–14585.
- 571 Nohales, M.-A., Molina-Serrano, D., Flores, R., Daròs, J.-A., 2012. Involvement of the  
572 Chloroplastic Isoform of tRNA Ligase in the Replication of Viroids Belonging to the  
573 Family Avsunviroidae. *J. Virol.* 86, 8269–8276. <https://doi.org/10.1128/jvi.00629-12>
- 574 Nohales, M.Á., Flores, R., Daròs, J.A., 2012. Viroid RNA redirects host DNA ligase 1 to act as

- 575 an RNA ligase. *Proc. Natl. Acad. Sci. U. S. A.* 109, 13805–13810.  
576 <https://doi.org/10.1073/pnas.1206187109>
- 577 Ortolá, B., Cordero, T., Hu, X., Daròs, J.A., 2021. Intron-assisted, viroid-based production of  
578 insecticidal circular double-stranded RNA in *Escherichia coli*. *RNA Biol.*  
579 <https://doi.org/10.1080/15476286.2021.1872962>
- 580 Peschek, J., Acosta-Alvear, D., Mendez, A.S., Walter, P., 2015. A conformational RNA zipper  
581 promotes intron ejection during non-conventional XBP 1 mRNA splicing. *EMBO Rep.*  
582 16, 1688–1698. <https://doi.org/10.15252/embr.201540955>
- 583 Petrov, A.I., Zirbel, C.L., Leontis, N.B., 2013. Automated classification of RNA 3D motifs and  
584 the RNA 3D Motif Atlas. *RNA* 19, 1327–1340. <https://doi.org/10.1261/rna.039438.113>
- 585 Pley, H.W., Flaherty, K.M., McKay, D.B., 1994. Three-dimensional structure of a hammerhead  
586 ribozyme. *Nature*. 372, 68–74.
- 587 Qi, Y., Ding, B., 2002. Replication of Potato spindle tuber viroid in cultured cells of tobacco  
588 and *Nicotiana benthamiana*: the role of specific nucleotides in determining replication  
589 levels for host adaptation. *Virology* 302, 445–456. <https://doi.org/10.1006/viro.2002.1662>
- 590 Qi, Y.J., Ding, B., 2003. Inhibition of cell growth and shoot development by a specific  
591 nucleotide sequence in a noncoding viroid RNA. *Plant Cell* 15, 1360–1374.
- 592 Robertus, J.D., Ladner, J.E., Finch, J.T., Rhodes, D., Brown, R.S., Clark, B.F.C., Klug, A.,  
593 1974. Structure of yeast phenylalanine tRNA at 3 Å resolution. *Nature* 250, 546–551.  
594 <https://doi.org/10.1038/250546a0>
- 595 Rubio Gomez, M.A., Ibba, M., 2020. Aminoacyl-tRNA synthetases. *RNA*.  
596 <https://doi.org/10.1261/rna.071720.119>
- 597 Sato, K., Hamada, M., Asai, K., Mituyama, T., 2009. CentroidFold: A web server for RNA  
598 secondary structure prediction. *Nucleic Acids Res.* 37. <https://doi.org/10.1093/nar/gkp367>
- 599 Spiesmacher, E., Mühlbach, H.P., Schnölzer, M., Haas, B., Sängler, H.L., 1983. Oligomeric  
600 forms of potato spindle tuber viroid (PSTV) and of its complementary RNA are present in  
601 nuclei isolated from viroid-infected potato cells. *Biosci. Rep.* 3, 767–774.
- 602 Wang, Y., 2021. Current view and perspectives in viroid replication. *Curr. Opin. Virol.*  
603 <https://doi.org/10.1016/j.coviro.2020.12.004>
- 604 Wassenegger, M., Spieker, R.L., Thalmeir, S., Gast, F.U., Riedel, L., Sängler, H.L., 1996. A  
605 single nucleotide substitution converts potato spindle tuber viroid (PSTVd) from a  
606 noninfectious to an infectious RNA for *Nicotiana tabacum*. *Virology* 226, 191–197.
- 607 Yang, K.J., Guo, L., Hou, X.L., Gong, H.Q., Liu, C.M., 2017. ZYGOTE-ARREST 3 that  
608 encodes the tRNA ligase is essential for zygote division in *Arabidopsis*. *J. Integr. Plant*

609 Biol. 59, 680–692. <https://doi.org/10.1111/jipb.12561>

610 Yoshihisa, T., 2014. Handling tRNA introns, archaeal way and eukaryotic way. *Front. Genet.*

611 <https://doi.org/10.3389/fgene.2014.00213>

612 Zirbel, C.L., Roll, J., Sweeney, B.A., Petrov, A.I., Pirrung, M., Leontis, N.B., 2015. Identifying

613 novel sequence variants of RNA 3D motifs. *Nucleic Acids Res.* 43, 7504–7520.

614 <https://doi.org/10.1093/nar/gkv651>

615

616

617 **LEGENDS TO THE FIGURES**

618

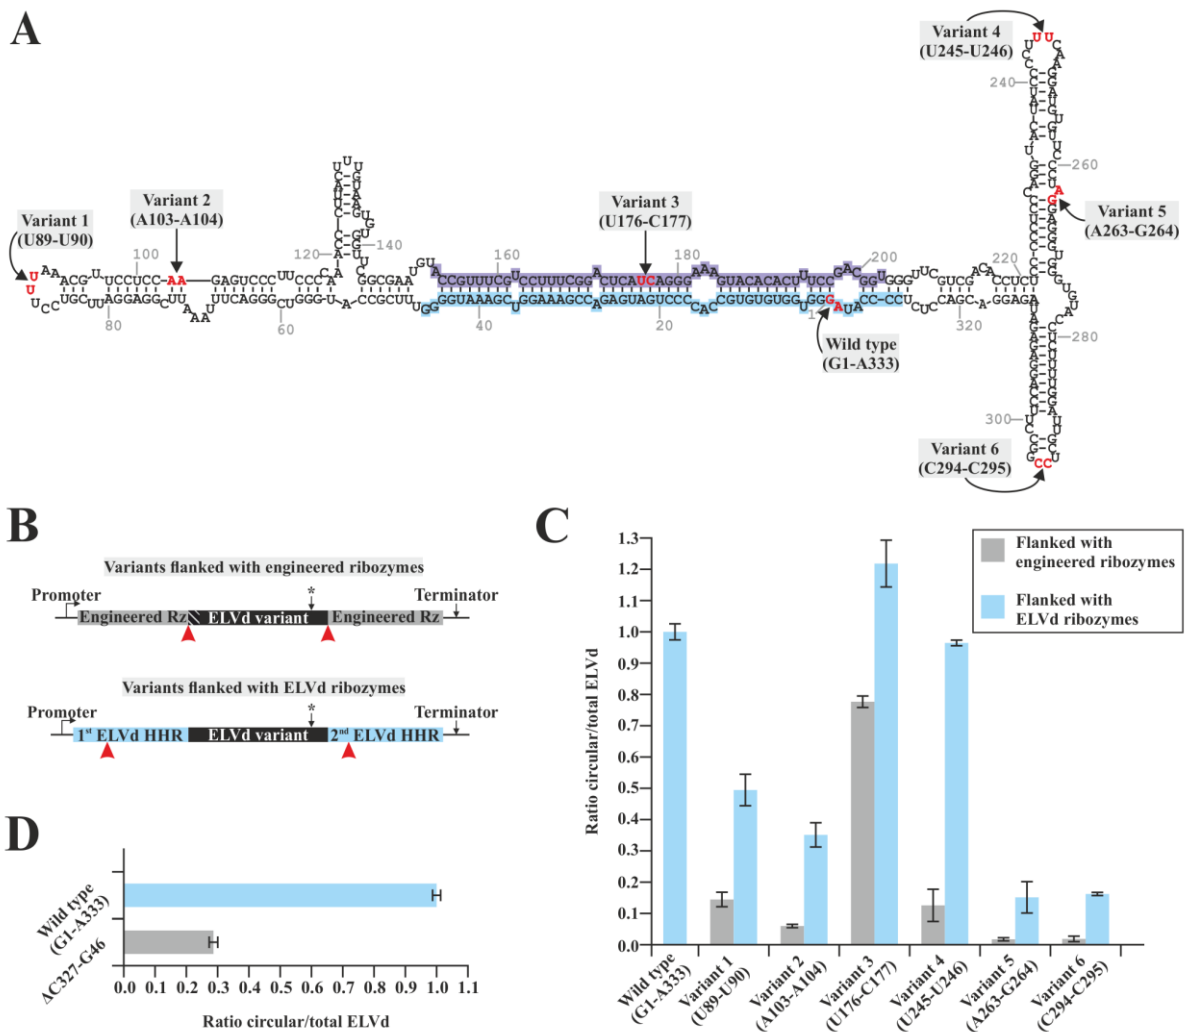

619

620

621 **FIG 1.** Eggplant tRNA ligase-mediated circularization of different monomeric linear ELVd (+)

622 RNAs opened at different sites. (A) Opening sites of wild-type ELVd (G1-A333) and Variants

623 1 to 6 (U89-U90, A103-A104, U176-C177, U245-U246, A263-G264, and C294-C295,

624 respectively) mapped onto the structure of the monomeric (+) circular ELVd. The domains of

625 the hammerhead ribozymes of both polarities are highlighted in ice blue (+) and pastel blue (-)

626 ). (B) For each variant, two constructs were generated, using either engineered ribozymes or

627 the ELVd + ribozyme. Cleavage sites are indicated by red arrowheads. The mutation in the

628 endogenous ribozyme CUGA is represented with an asterisk. Schematic representation is not

629 at scale. The RNA precursors were co-expressed in *E. coli* along with the tRNA ligase; the total

630 RNA from the bacteria was separated by 2D-PAGE and transferred to a membrane for northern

631 blot hybridization with an ELVd (-) probe. (C) Histogram showing the normalized

632 accumulation rate of monomeric circular versus monomeric total (circular plus linear) ELVd  
633 (+) of RNA variants flanked by engineered ribozymes (gray bars) or ELVd + ribozymes (blue  
634 bars). **(D)** Analysis of the circularization of an ELVd deletion mutant lacking the ribozyme  
635 sequence ( $\Delta$ C327-G46) and including engineered ribozymes. **(C and D)** Error bars represent  
636 the standard deviations in three independent *E. coli* clones.  
637

638

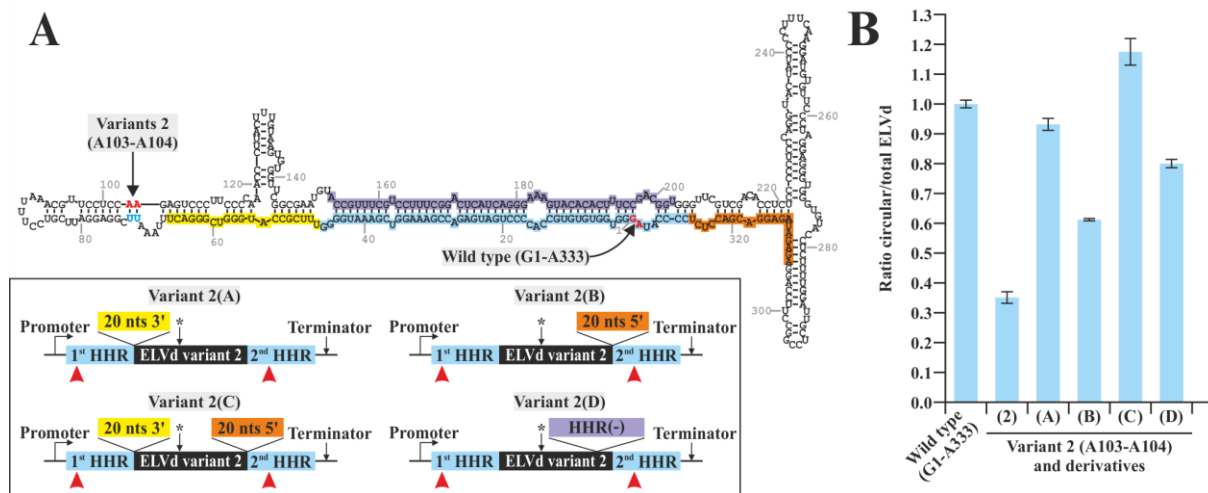

639

640

641 **FIG 2.** Analysis of the role of sequences surrounding the hammerhead ribozyme on the  
 642 monomeric linear ELVd (+) intermediate ligation by the eggplant tRNA ligase in *E. coli*. (A)  
 643 New set of mutants based on modifications in Variant 2 (opened at C294-C295), containing  
 644 ELVd hammerhead ribozyme (+) halves in both termini. A schematic representation (not at  
 645 scale) of Variants 2A, B, C, and D is shown in the box. Variants 2A, B, and C contained a 20-  
 646 nt extension of their 3' end, 5' end, or both 3' and 5' ends, respectively. Variant 2D contained  
 647 the insertion of the domain corresponding to the ribozyme with - polarity inserted between  
 648 positions U72 and U73 (in blue). The sequences of hammerhead ribozymes of both polarities  
 649 are ice blue (+) and pastel blue (-). Cleavage sites of the hammerhead ribozymes are indicated  
 650 by red arrowheads. The mutation in the endogenous CUGA sequence is represented with an  
 651 asterisk. (B) Circularization rates were analyzed by northern blot hybridization of 2D separated  
 652 RNA from *E. coli* clones, in which the ELVd variants were co-expressed with eggplant tRNA  
 653 ligase. Histogram showing the accumulation rate of monomeric circular versus monomeric total  
 654 (circular and linear) ELVd (+) RNA in the indicated variants. Error bars represent the standard  
 655 deviations in three independent *E. coli* clones.

656

657

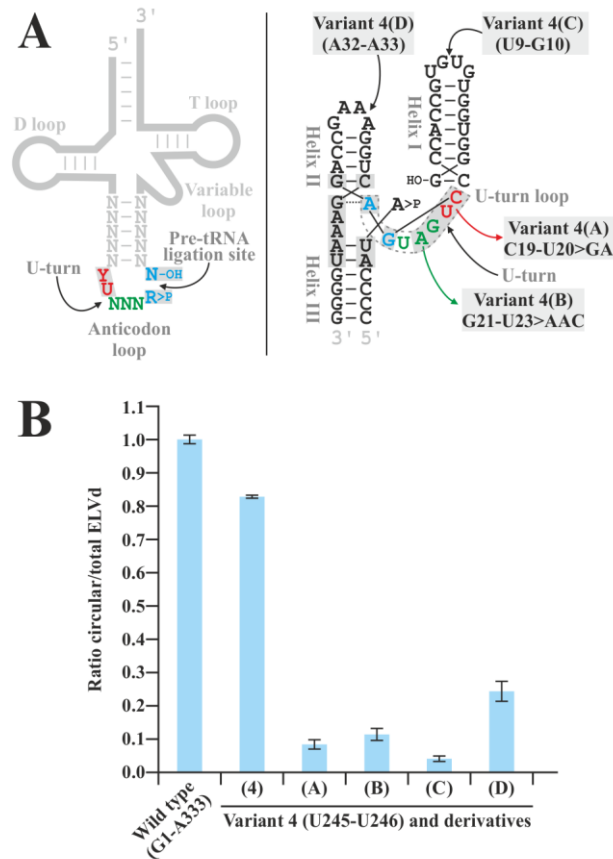

658

659 **FIG 3.** Analysis of the hammerhead ribozyme domain sequences that are relevant during the  
 660 eggplant tRNA ligase-mediated ligation process. (A) Generic cloverleaf structure of tRNAs,  
 661 focusing the anticodon loop (left) and the ELVd (+) hammerhead ribozyme functional structure  
 662 during self-cleavage (right). Conserved nucleotides of each RNA are shown in light grey boxes.  
 663 The analogous nucleotides between both RNAs share colors. ELVd Variants 4A and B, with  
 664 nucleotide substitution C19-U20>GA and G21-U23>AAC, and 4C and D, opened in different  
 665 positions in the ribozyme (U9-G10 and A32-A33, respectively), are indicated. (B) ELVd  
 666 variants were expressed in *E. coli* along with the eggplant tRNA ligase. Total RNA was 2D  
 667 separated and analyzed by northern blot hybridization. Histogram shows the circularization  
 668 rates (monomeric circular versus monomeric circular plus linear). Error bars represent the  
 669 standard deviations in three independent *E. coli* clones.

670

671

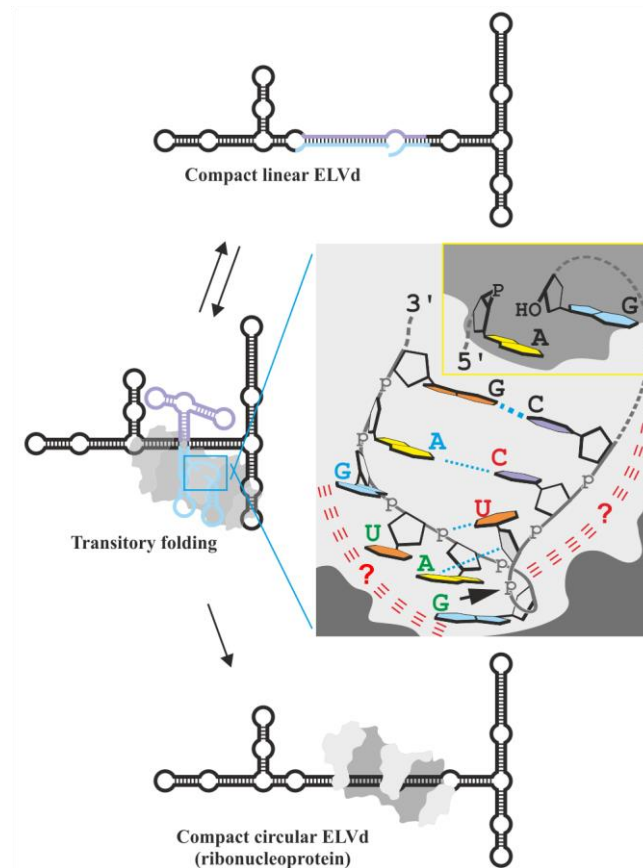

672

673 **FIG 4.** Proposed model of the ELVd circularization mechanism. The natural viroid ligation site  
674 is located in a quasi-double-stranded structure formed by the hybridization of + and -  
675 hammerhead ribozyme domains in the central region of the molecule. It is likely that this region  
676 could form an alternative, less compact structure in which a characteristic folding of both  
677 ribozyme domains allows the access of the eggplant tRNA ligase to the terminal nucleotides  
678 for the ligation. The model proposes a role for the ribozyme U-turn loop in the enzymatic  
679 ligation process. This loop may adopt a fold similar to that of the tRNA anticodon loops that is  
680 recognized by the tRNA ligase via unknown interactions (red lines). In the model, the terminal  
681 nucleotides, located in the proximity of the catalytic pocket, are correctly positioned in the  
682 ligase catalytic center (yellow insert) for its ligation.



**A**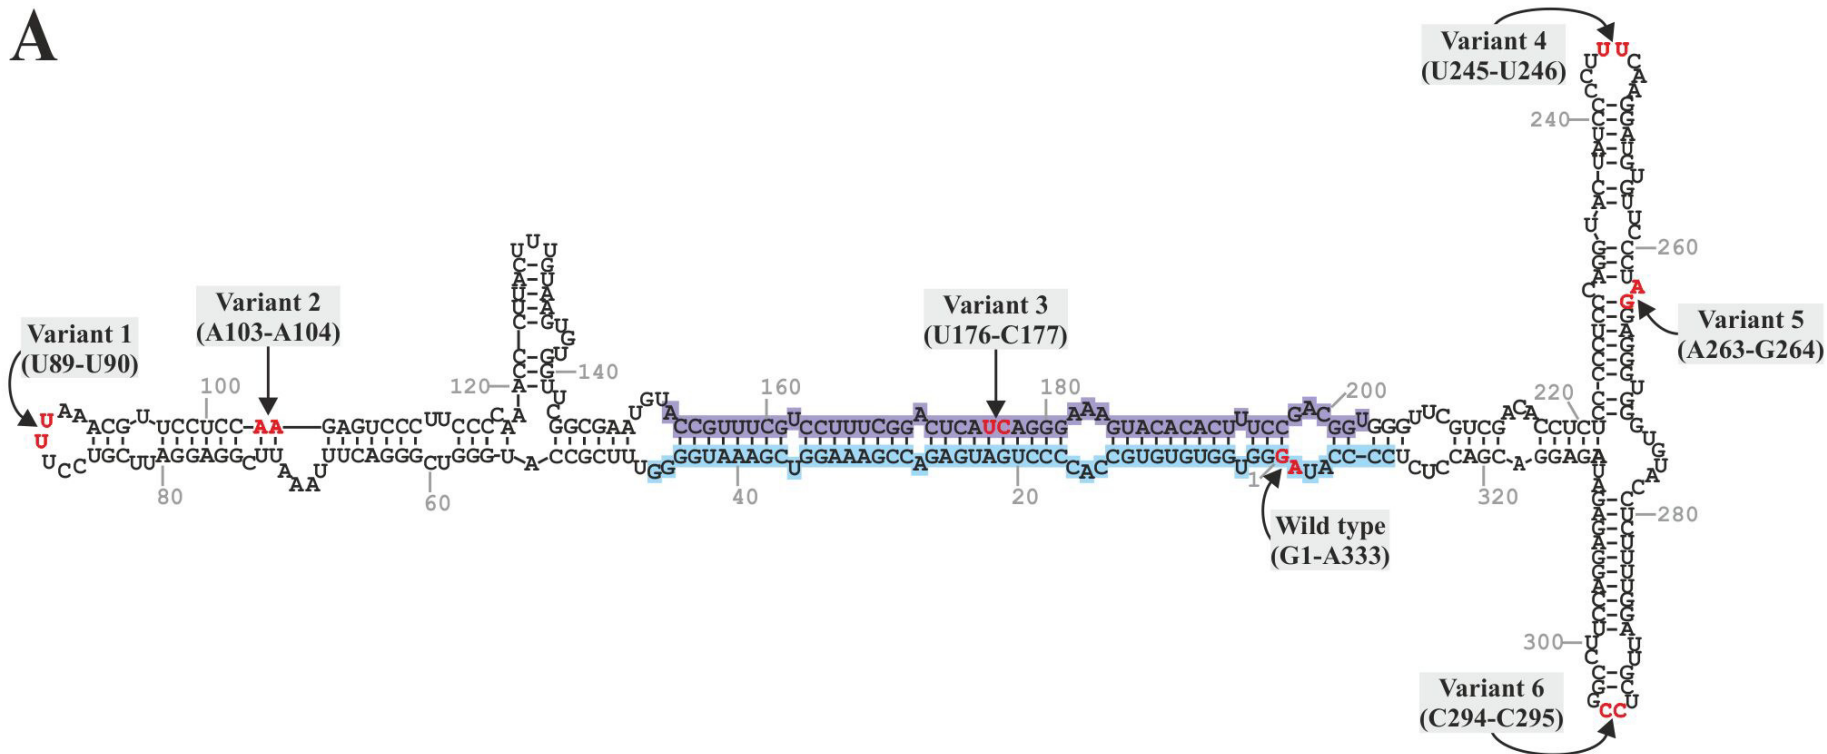**B**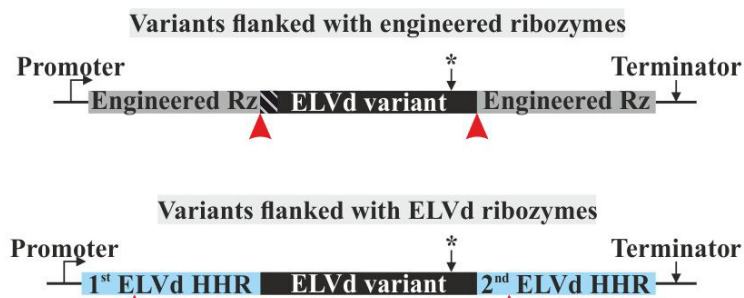**C**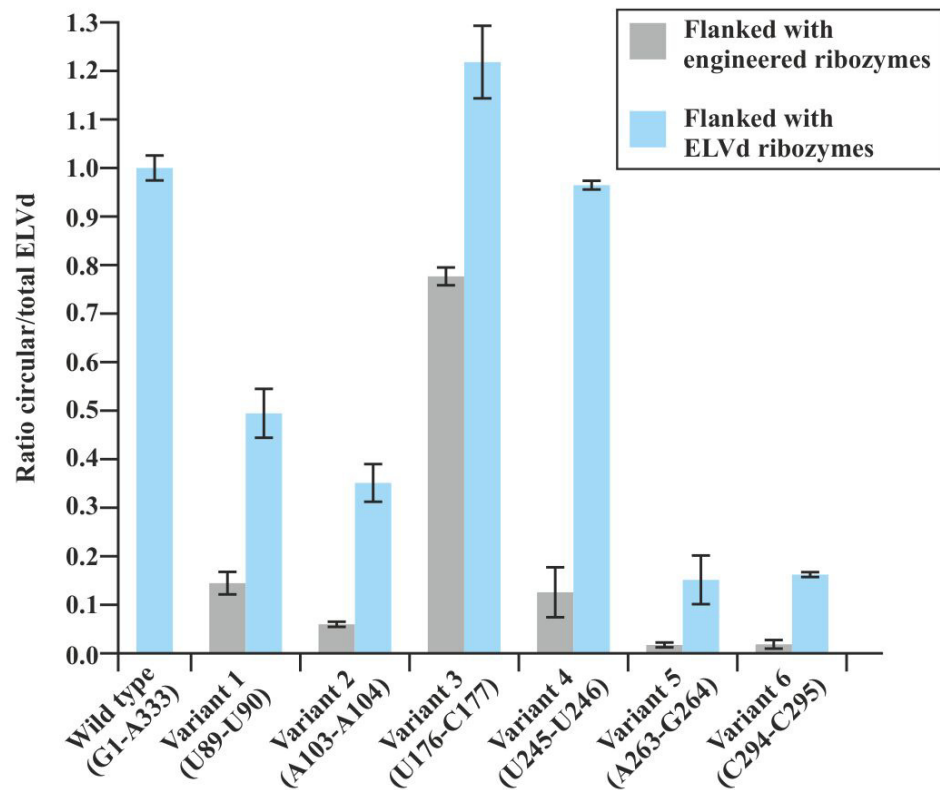**D**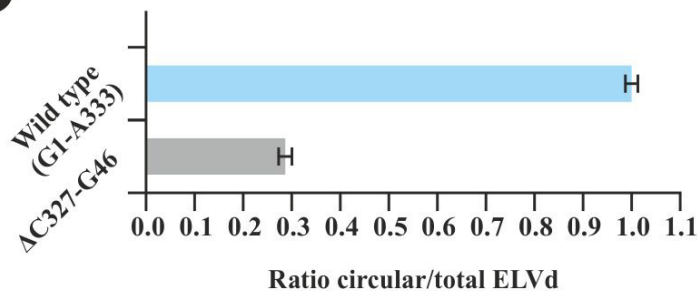

**A**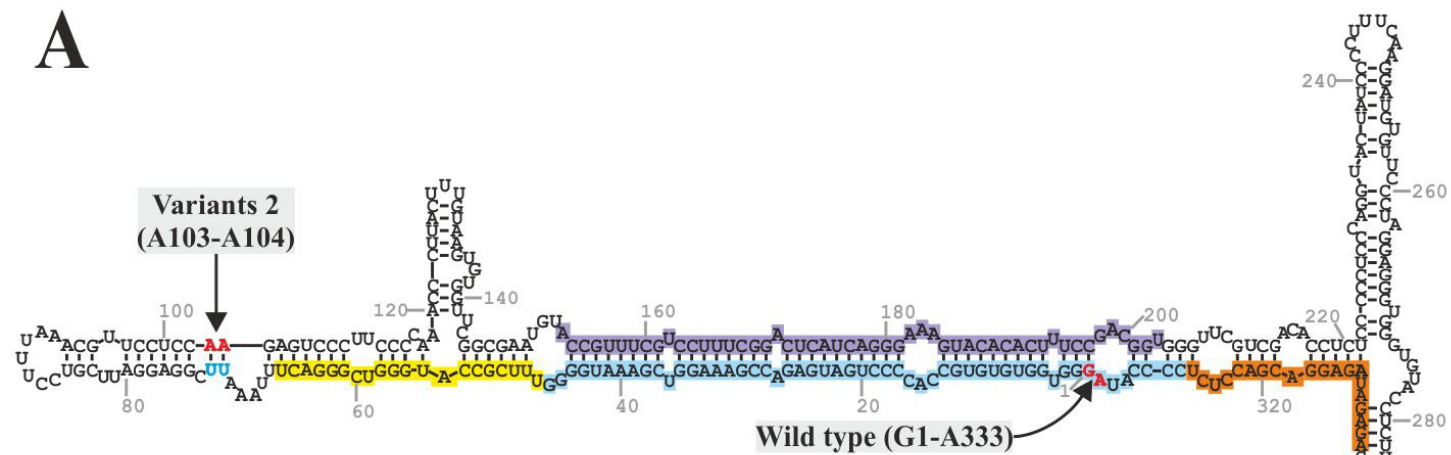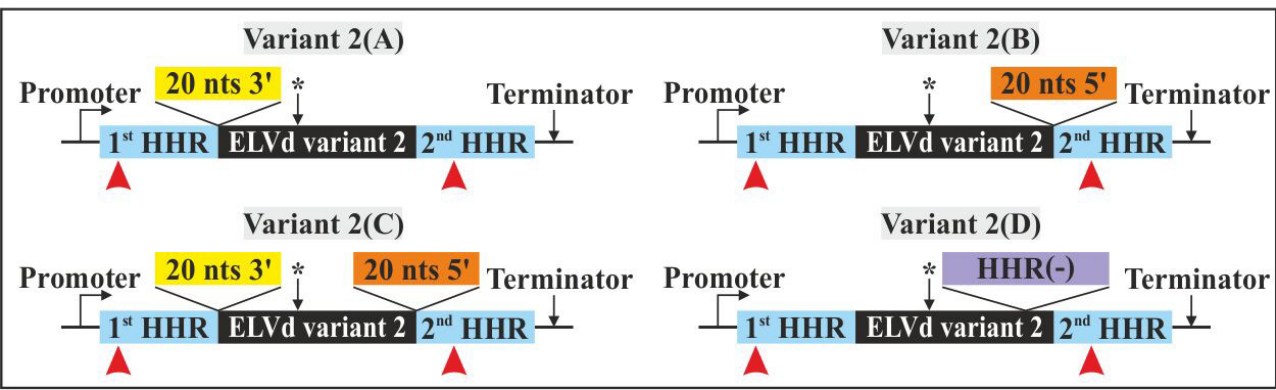**B**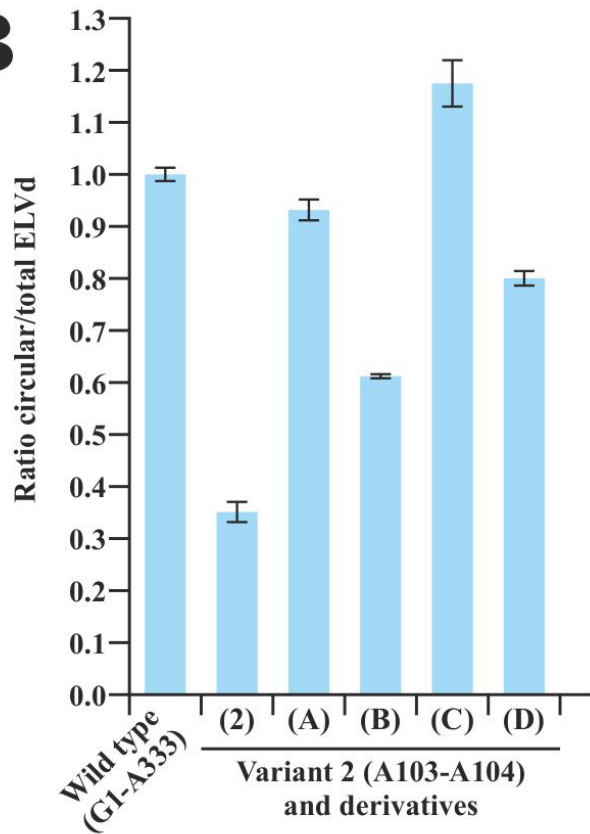

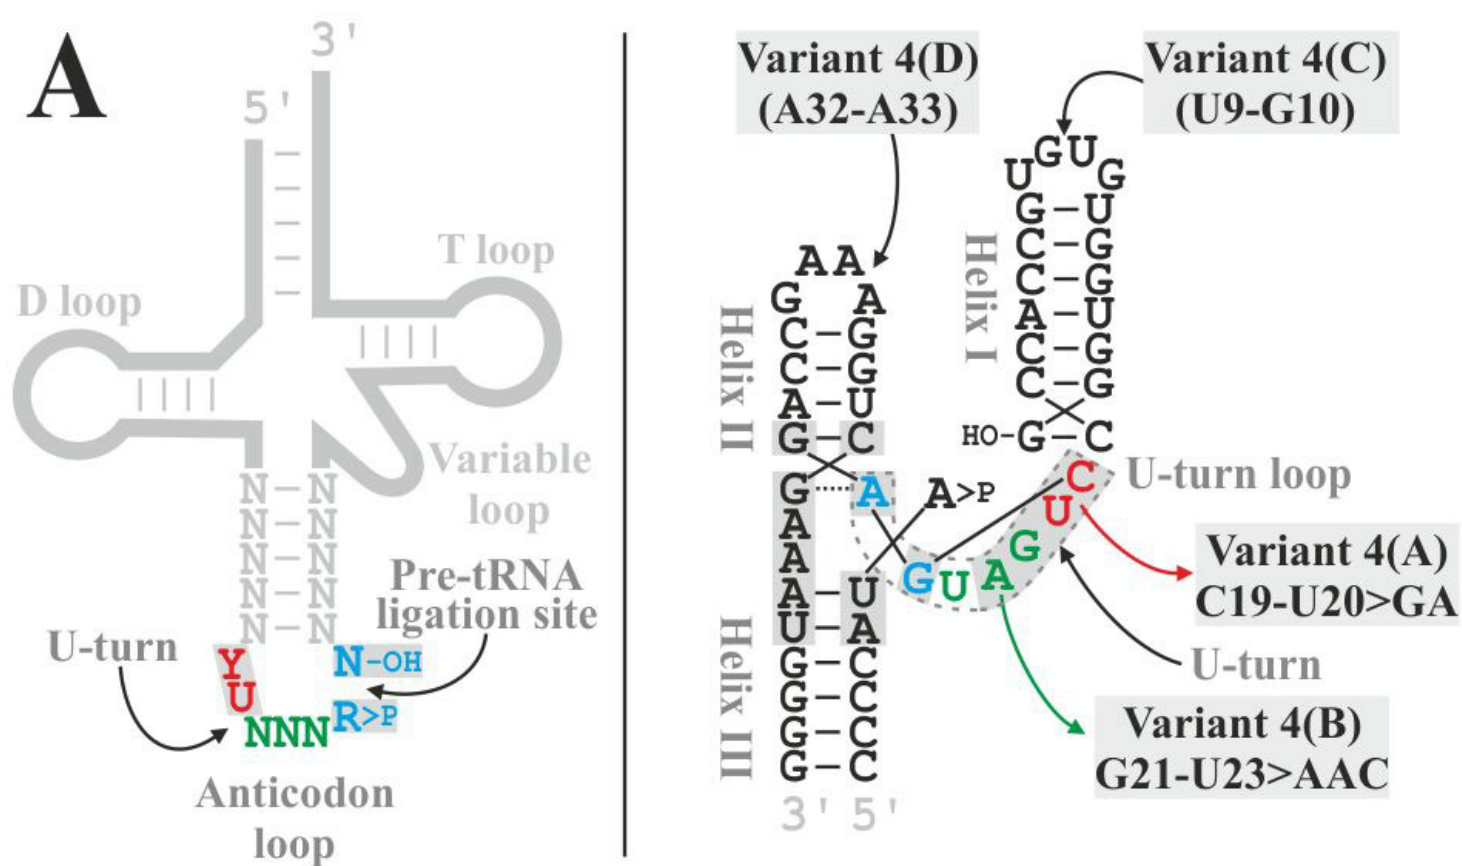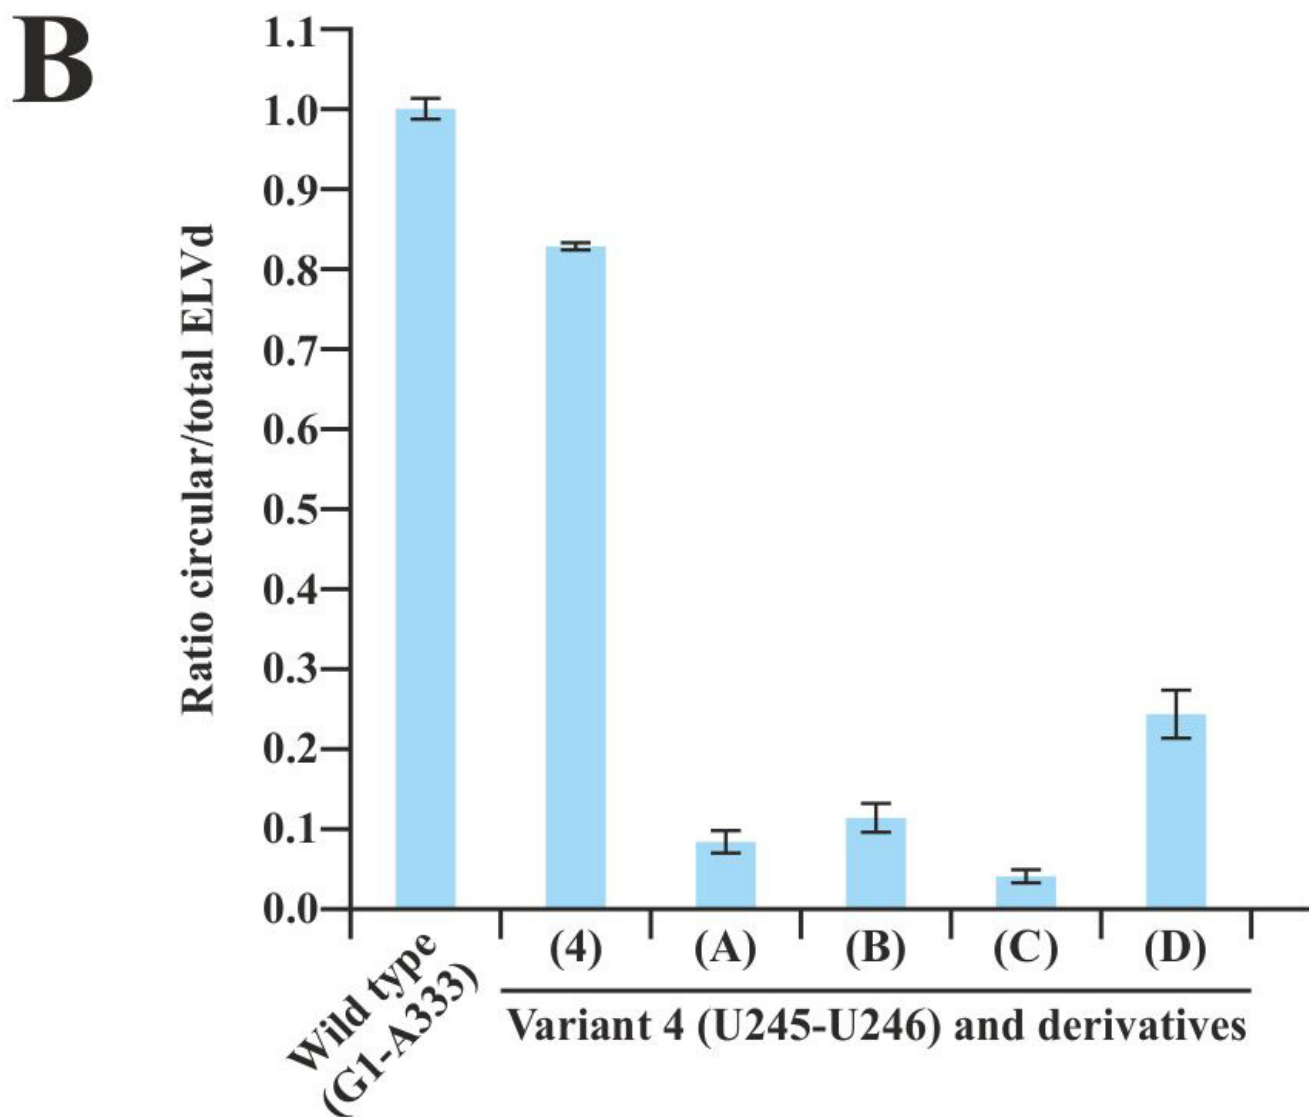

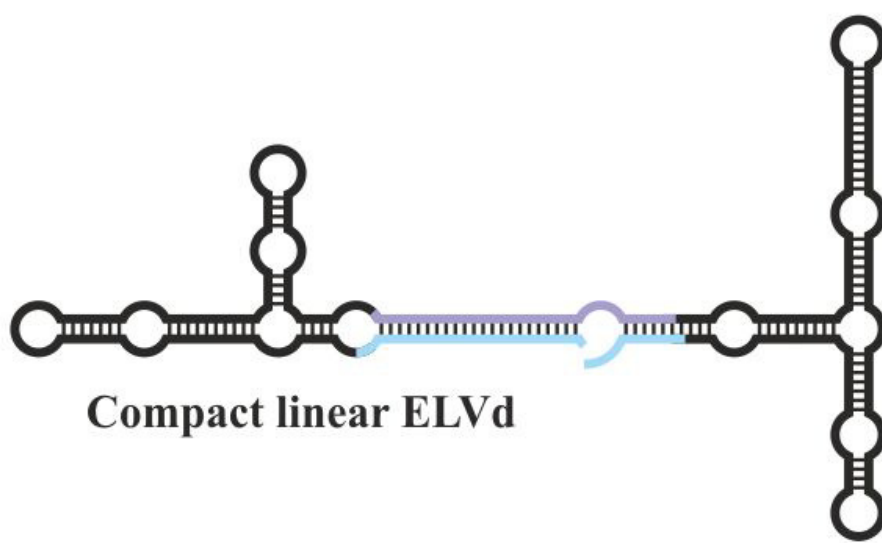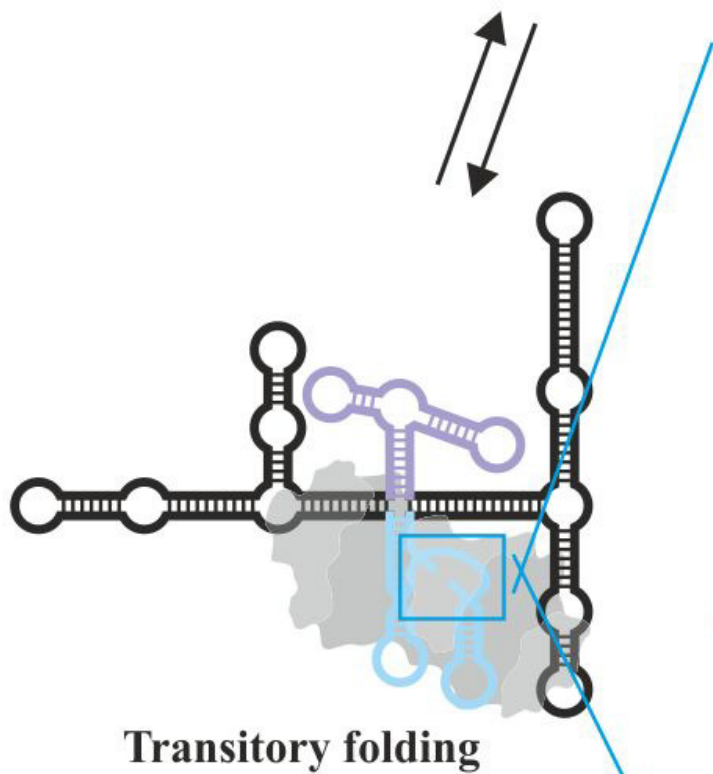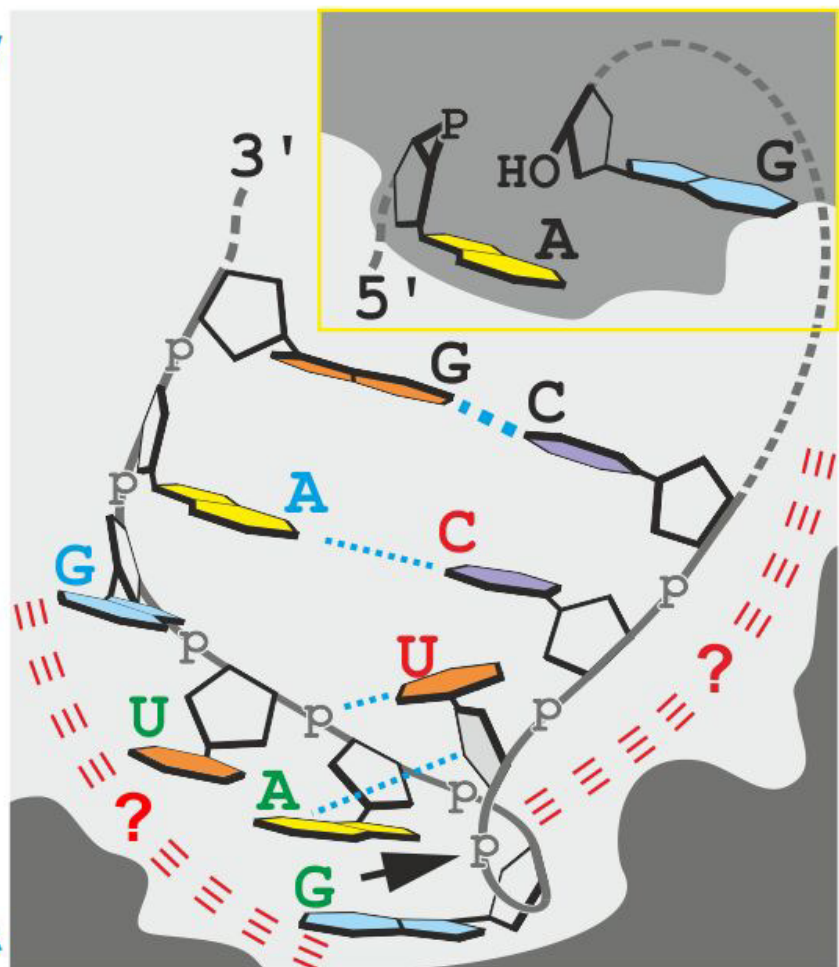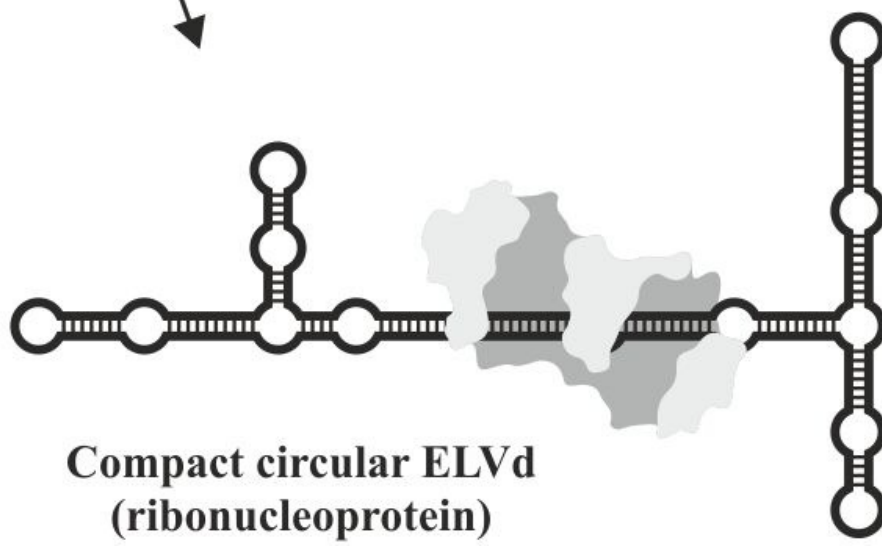

Source: http://biorxiv.org/content/10.1101/2022.01.19.477025v1.full.pdf
